# Supplementary material for: In Vitro Biological Properties of Cyclodextrin-Based Polymers: Interaction with Human Serum Albumin, Red Blood Cells and Bacteria
Source: MDPI journal article supplement (doi:10.3390/polysaccharides4040020), 2023-09-28

**Table S1.** The degree of substitution (DS) for CD-based polymers.

| CD-based poymer | DS                |                  |
|-----------------|-------------------|------------------|
|                 | FTIR-spectroscopy | NMR-spectroscopy |
| MPolS           | 3.6               | 3,0              |
| HPolS           | 3.9               | 3.1              |
| HPolH           | 1.0               | 0.8              |
| MPolH           | 0.6               | 0.6              |

**Figure S1.** The size distribution of the sample HPolS obtained by NTA in Milli Q water, 25°C

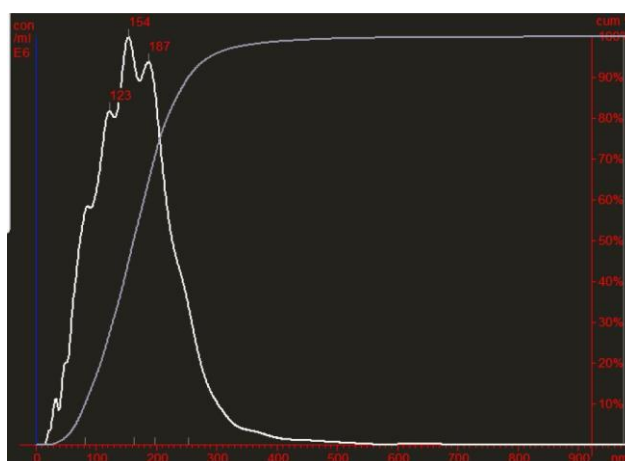

**Figure S2.**  $^1\text{H}$  NMR of HPCD, succinic anhydride, HPolH, HPolS, MPolH and MPolS,  $\text{D}_2\text{O}$ , 400 MHz.

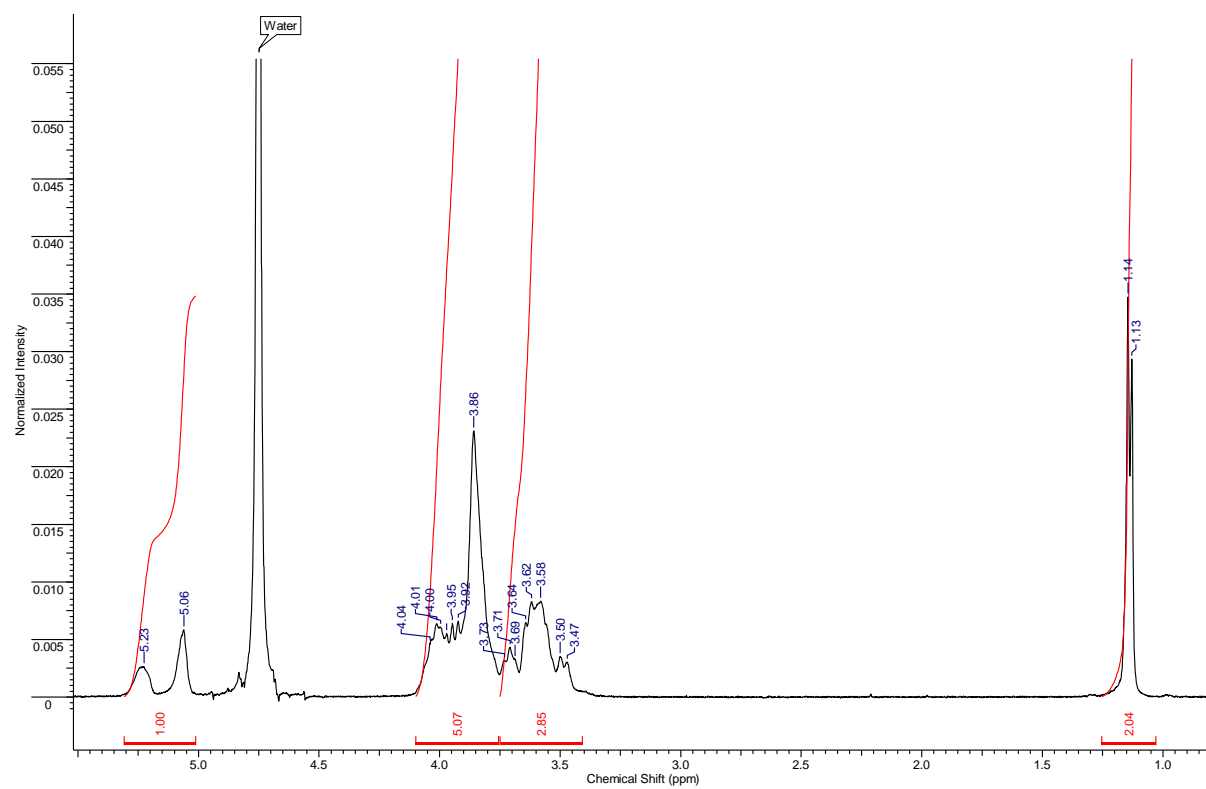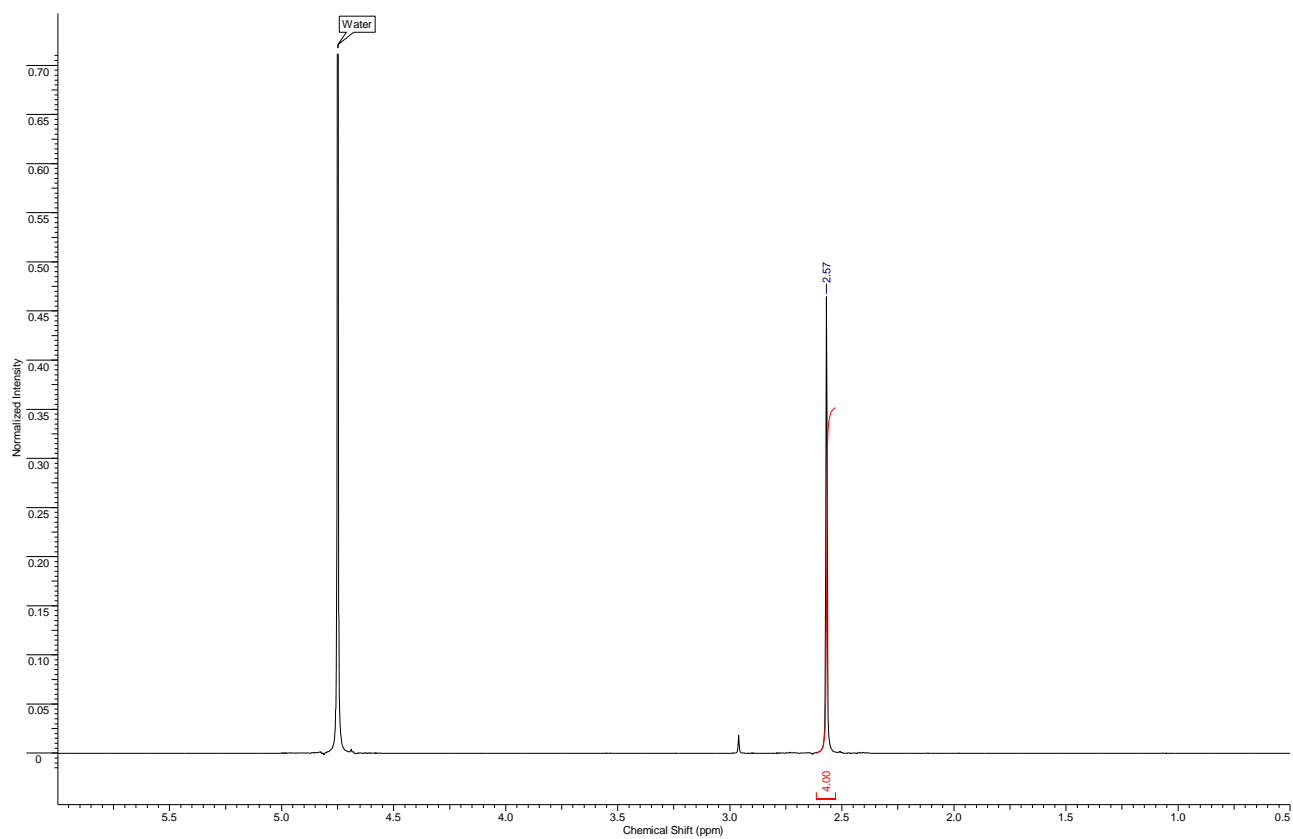

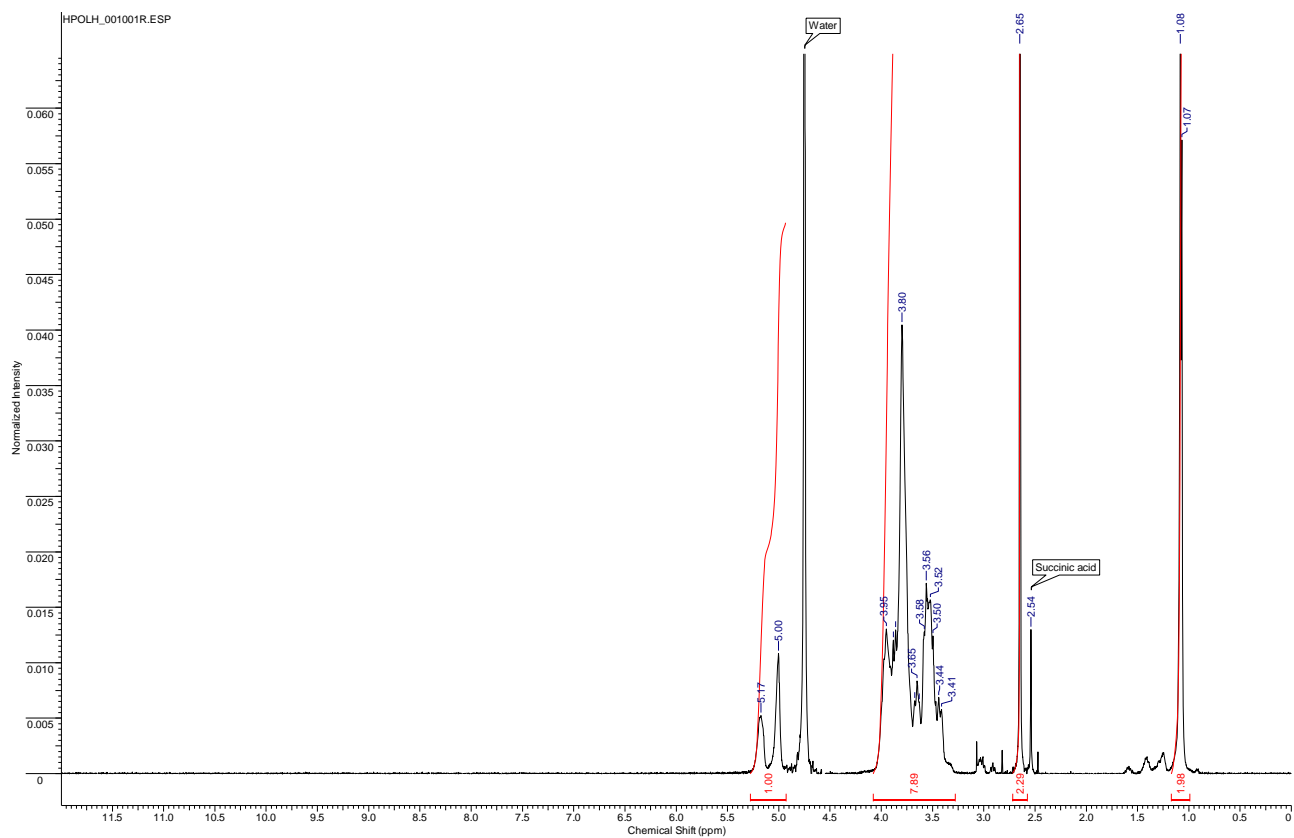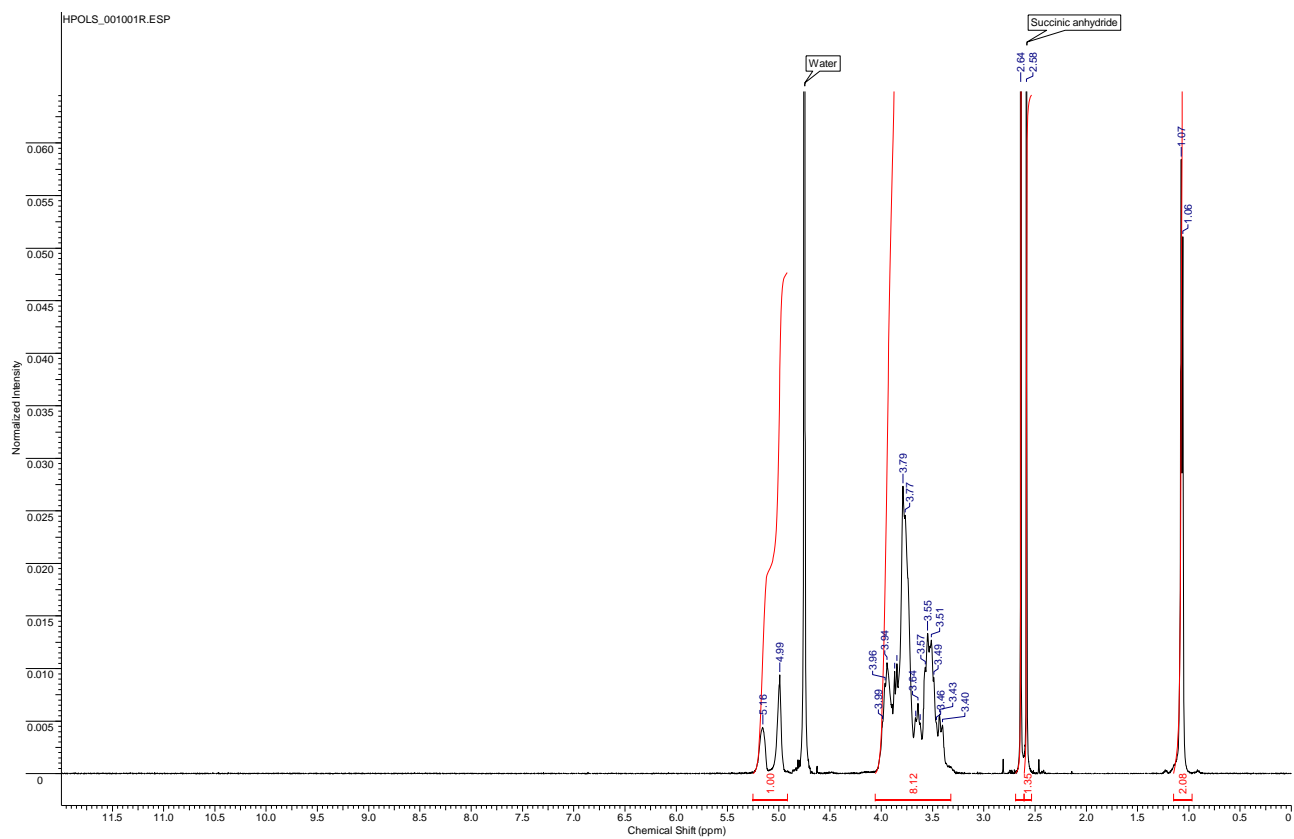

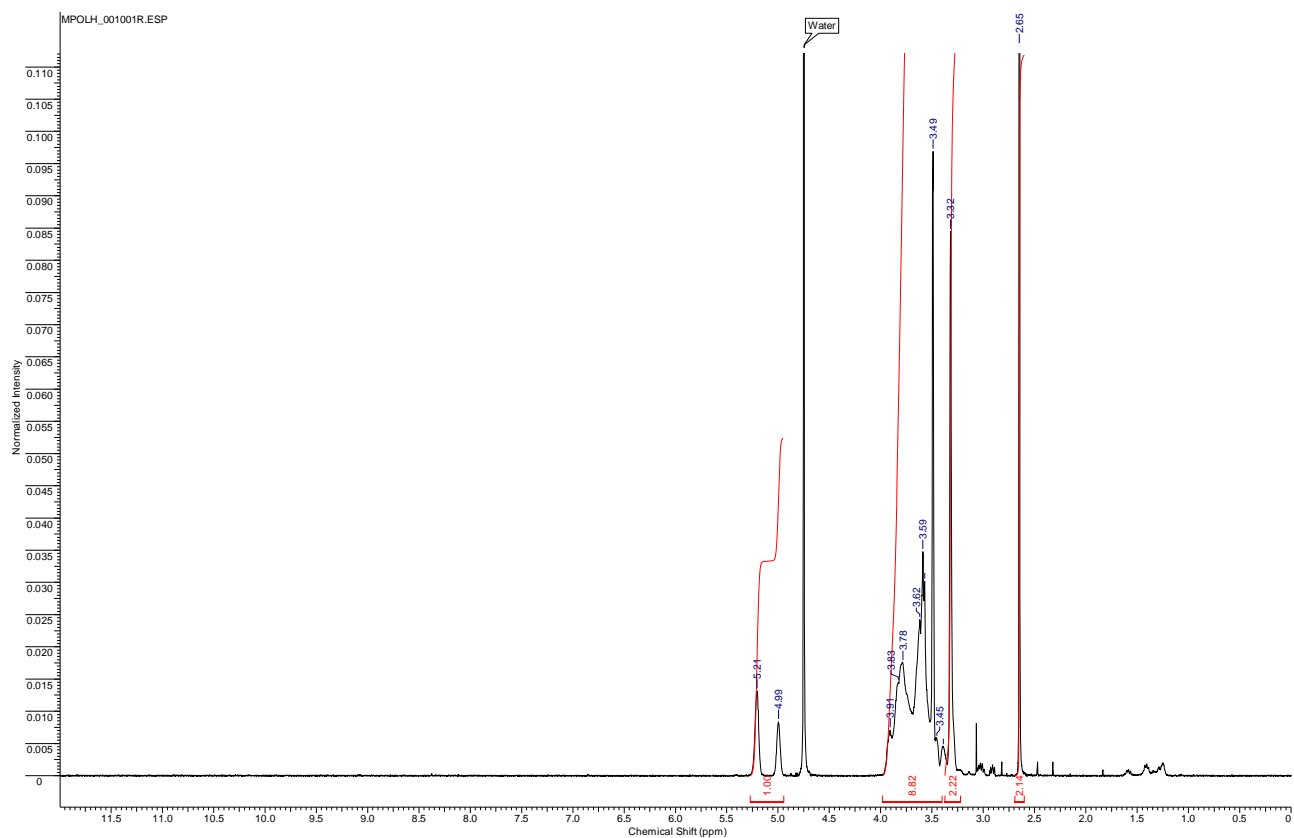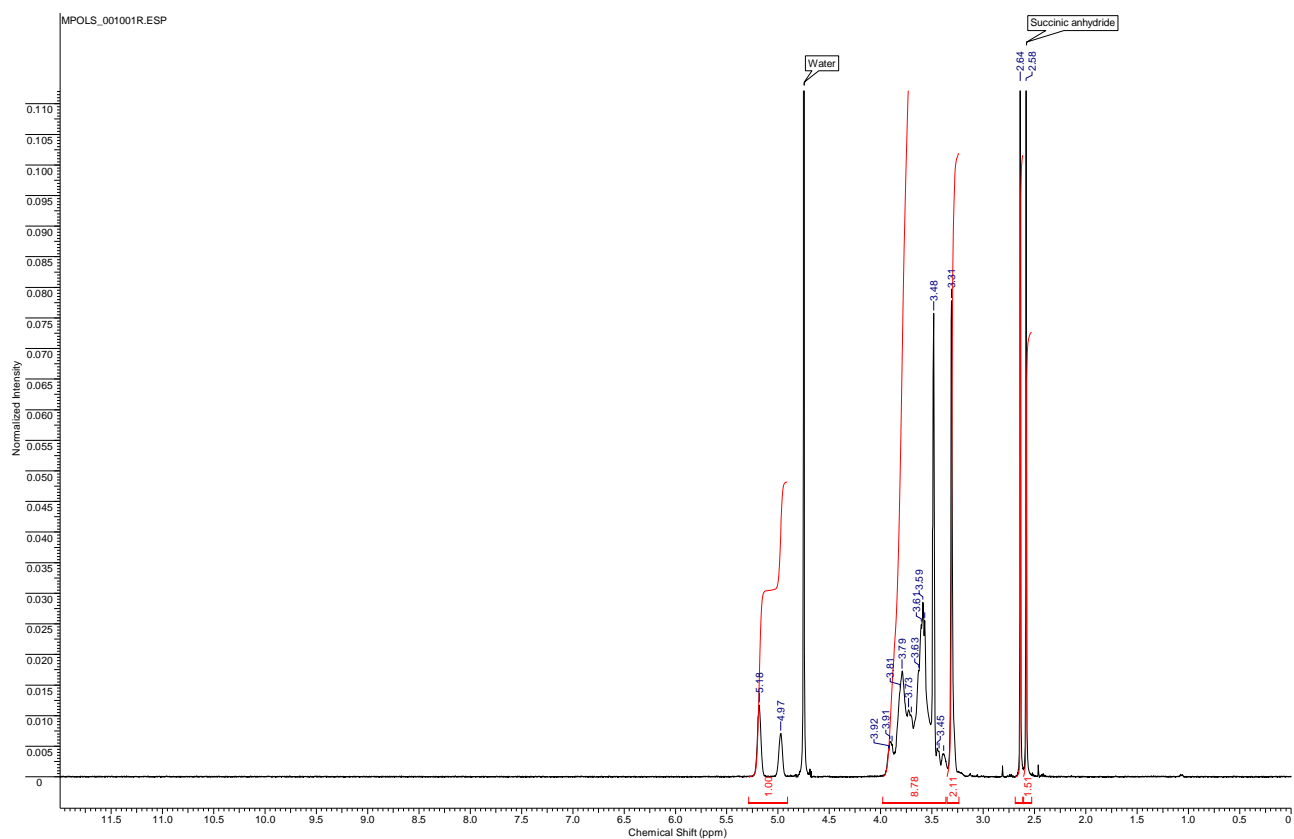

Supplement: s1 [file s1]
